# Supplementary material for: The HIF-1 Hypoxia-Inducible Factor Modulates Lifespan in C. elegans
Source: PLoS One. 2009 Jul 27;4(7):e6348. doi: 10.1371/journal.pone.0006348 (PMC2711329; doi:10.1371/journal.pone.0006348)
Supplement: Table S1 — Data from individual lifespan experiments (0.16 MB DOC) [file pone.0006348.s001.doc]

**Table S1: Data from individual lifespan experiments**

| **Genotype** | **life span**  **mean +S.E.** | **Percentage *v*. control** | **Maximum lifespan** | **n** | ***p* value*** |
| --- | --- | --- | --- | --- | --- |
| N2 wild-type | 19.9 ± 0.5 |  | 26 | 41 |  |
| N2 wild-type | 20.3 ± 0.6 |  | 26 | 39 |  |
| N2 wild-type | 20.0 ± 0.6 |  | 26 | 41 |  |
| N2 wild-type | 20.4 ± 0.5 |  | 30 | 45 |  |
| *iaIs27* [*Phif-1::hif-1::myc]* | 23.5 ± 0.5 | 18***** | 34 | 47 | <0.0001***** |
| *iaIs27* [*Phif-1::hif-1::myc]* | 21.3 ± 0.8 | 7***** | 36 | 45 | 0.04***** |
| *iaIs27* [*Phif-1::hif-1::myc]* | 21.4 ± 1.2 | 7***** | 36 | 17 | 0.03***** |
| *iaIs28 [Phif-1::hif-1::myc]* | 24.6 ± 0.6 | 23***** | 36 | 46 | <0.0001***** |
| *iaIs28 [Phif-1::hif-1::myc]* | 22.0 ± 0.6 | 10***** | 28 | 40 | 0.003***** |
| *iaIs28 [Phif-1::hif-1::myc]* | 22.2 ± 0.4 | 11***** | 30 | 45 | 0.001***** |
| *iaIs32 [Phif-1::hif-1(P621G)::myc]* | 27.2 ± 0.7 | 36***** | 36 | 41 | <0.0001***** |
| *iaIs32 [Phif-1::hif-1(P621G)::myc]* | 27.0 ± 1.1 | 35***** | 38 | 39 | <0.0001***** |
| *iaIs32 [Phif-1::hif-1(P621G)::myc]* | 23.4 ± 0.9 | 17***** | 36 | 37 | <0.0001***** |
| *iaIs33 [Phif-1::hif-1(P621G)::myc]* | 25.3 ± 0.8 | 27***** | 36 | 42 | <0.0001***** |
| *iaIs33 [Phif-1::hif-1(P621G)::myc]* | 24.7 ± 1.2 | 23***** | 40 | 41 | <0.0001***** |
| *iaIs33 [Phif-1::hif-1(P621G)::myc]* | 22.2 ± 0.7 | 11***** | 34 | 42 | 0.001***** |
| *iaIs34 [Phif-1::hif-1(P621G)::myc]* | 28.3 ± 0.6 | 42***** | 38 | 36 | <0.0001***** |
| *iaIs34 [Phif-1::hif-1(P621G)::myc]* | 27.3 ± 0.8 | 37***** | 38 | 43 | <0.0001***** |
| *iaIs34 [Phif-1::hif-1(P621G)::myc]* | 24.9 ± 0.5 | 25***** | 34 | 46 | <0.0001***** |
| *hif-1(ia04)* | 25.7 ± 1.1 | 34***** | 34 | 27 | <0.0001***** |
| *hif-1(ia04)* | 24.2 ± 0.7 | 21***** | 34 | 43 | <0.0001***** |
| *hif-1(ia04)* | 25.6 ± 0.8 | 28***** | 32 | 44 | <0.0001***** |
| *hif-1(ia04)* | 21.5 ± 0.7 | 8***** | 32 | 33 | 0.002***** |
| *hif-1(ia07)* | 26.6 ± 1.0 | 33***** | 36 | 29 | <0.0001***** |
| *hif-1(ia07)* | 27.2 ± 0.9 | 36***** | 38 | 33 | <0.0001***** |
| *hif-1(ok2564)* | 22.8 ± 0.6 | 14***** | 30 | 43 | <0.0001***** |
| *hif-1(ok2564)* | 22.2 ± 0.7 | 11***** | 31 | 31 | <0.0001***** |
| *egl-9(sa307)* | 21.8 ± 0.7 | 9***** | 29 | 32 | 0.007***** |
| *egl-9(sa307)* | 21.5 ± 0.5 | 8***** | 26 | 27 | 0.007***** |
| *egl-9(sa307)* | 20.5 ± 0.7 | 3***** | 30 | 34 | 0.45***** |
| *egl-9(sa307)* | 19.6 ± 0.6 | -2***** | 28 | 38 | 0.41***** |
| *egl-9(sa307);hif-1(ia04)* | 18.7 ± 0.5 | -7***** | 24 | 45 | 0.3***** |
| *egl-9(sa307);hif-1(ia04)* | 20.7 ± 0.4 | 4***** | 26 | 47 | 0.8***** |
| *egl-9(sa307);hif-1(ia04)* | 18.1 ± 0.4 | -9***** | 26 | 42 | 0.0003***** |
| *daf-16(mu86)* | 15.6 ± 0.6 |  | 22 | 41 |  |
| *daf-16(mu86)* | 15.4 ± 0.5 |  | 20 | 37 |  |
| *daf-16(mu86)* | 15.1 ± 0.6 |  | 24 | 34 |  |
| *daf-16(mu86)* | 15.2 ± 0.4 |  | 20 | 40 |  |
| *daf-16(mu86)* | 14.1 ± 0.4 |  | 20 | 39 |  |
| *daf-16(mu86); hif-1(ia04)* | 13.7 ± 0.4 | -12† | 20 | 41 | 0.003† |
| *daf-16(mu86); hif-1(ia04)* | 14.5 ± 0.4 | -6† | 20 | 33 | 0.14† |
| *daf-16(mu86); hif-1(ia04)* | 16.6 ± 0.4 | 10† | 20 | 30 | 0.11† |
| *daf-16(mu86); iaIs32* | 19.8 ± 0.6 | 30† | 26 | 41 | <0.0001† |
| *daf-16(mu86); iaIs32* | 18.1 ± 0.7 | 28† | 26 | 36 | <0.0001† |
| *daf-16(mu86); iaIs34* | 20.3 ± 0.6 | 33† | 28 | 40 | <0.0001† |
| *daf-16(mu86); iaIs34* | 20.2 ± 0.6 | 33† | 26 | 38 | <0.0001† |
| *skn-1(zu67)* | 15.1 ± 0.3 |  | 22 | 58 |  |
| *skn-1(zu67)* | 16.1 ± 0.7 |  | 26 | 29 |  |
| *skn-1(zu67);hif-1(ia04)* | 14.6 ± 0.4 | -3‡ | 20 | 52 | 0.57‡ |
| *skn-1(zu67);hif-1(ia04)* | 15.5 ± 1.1 | -4‡ | 30 | 24 | 0.8‡ |
| *skn-1(zu67); iaIs32* | 19.1 ± 0.5 | 26‡ | 28 | 58 | <0.0001‡ |
| *skn-1(zu67); iaIs32* | 19.4 ± 0.7 | 20‡ | 30 | 40 | <0.0001‡ |
| *skn-1(zu67); iaIs34* | 16.3 ± 0.4 | 8‡ | 26 | 49 | 0.002‡ |
| *skn-1(zu67); iaIs34* | 18.7 ± 0.7 | 16‡ | 30 | 59 | <0.0001‡ |
| *daf-2(e1370)* | 29.6 +2.0 |  | 50 | 23 |  |
| *daf-2(e1370)* | 32.6 +1.7 |  | 48 | 24 |  |
| *daf-2(e1370)* | 34.9 +1.7 |  | 50 | 29 |  |
| *daf-2(e1370); hif-1(ia04)* | 28.7 +3.1 | -3¥ | 54 | 15 | 0.77¥ |
| *daf-2(e1370); hif-1(ia04)* | 35.5 +1.6 | 9¥ | 54 | 30 | 0.18¥ |
| *daf-2(e1370); hif-1(ia04)* | 35.3 +1.7 | 5¥ | 54 | 30 | 0.9¥ |
| *daf-2(e1370); iaIs32* | 35.8 +3.2 | 16¥ | 58 | 17 | 0.007¥ |
| *daf-2(e1370); iaIs32* | 25.2 +1.7 | -16¥ | 40 | 28 | 0.6¥ |
| *daf-2(e1370); iaIs34* | 31.5 +1.2 | 3¥ | 54 | 21 | 0.6¥ |
| *daf-2(e1370); iaIs34* | 31.2 +2.0 | 2¥ | 52 | 23 | 0.6¥ |
| *daf-2(e1370); iaIs34* | 27.8 +2.4 | -10¥ | 42 | 21 | 0.42¥ |

* The longevity of was compared to wild-type N2, and the *p* values were calculated by log-rank tests.

† The longevity of was compared to *daf-16(mu86)* worms, and the *p* values were calculated by log-rank tests.

‡ The longevity of was compared to *skn-1(zu67)* worms, and the *p* values were calculated by log-rank tests.

¥ The longevity of was compared to *daf-2(e1370)* worms, and the *p* values were calculated by log-rank tests.

The experiments in Table S1 were conducted at 20oC on live bacterial food, as described in the Materials and Methods of the main text, with the exception of the strains including the *daf-2(e1370)* mutation, which were assayed at 25oC.
